# Supplementary material for: Light-assisted rapid preparation of a Ni/g-C3N4 magnetic composite for robust photocatalytic H2 evolution from water
Source: Royal Society of Chemistry journal article supplement (doi:10.1039/c6ta03178a), 2016-01-01
Supplement: c6ta03178a1.pdf [file c6ta03178a1.pdf]

## Supporting Information

### Light-assisted rapid preparation of Ni/g-C<sub>3</sub>N<sub>4</sub> magnetic composite for robust photocatalytic H<sub>2</sub> evolution from water

Linggong Kong, Yuming Dong\*, Pingping Jiang, Guangli Wang, Huizhen Zhang and Na Zhao

\* E-mail: dongym@jiangnan.edu.cn.

Fax: +8651085917763

The Key Laboratory of Food Colloids and Biotechnology, Ministry of Education, School of Chemical and Material Engineering, Jiangnan University, Wuxi 214122, China

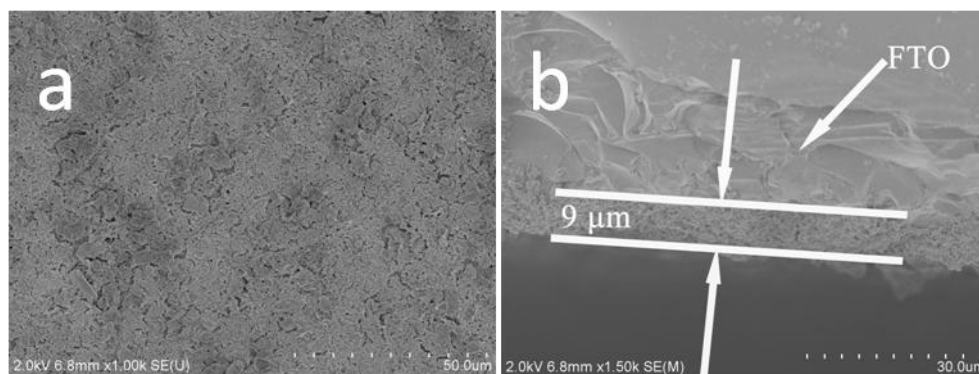

Figure S1. SEM image of Ni/g-C<sub>3</sub>N<sub>4</sub> on FTO conductive glass.

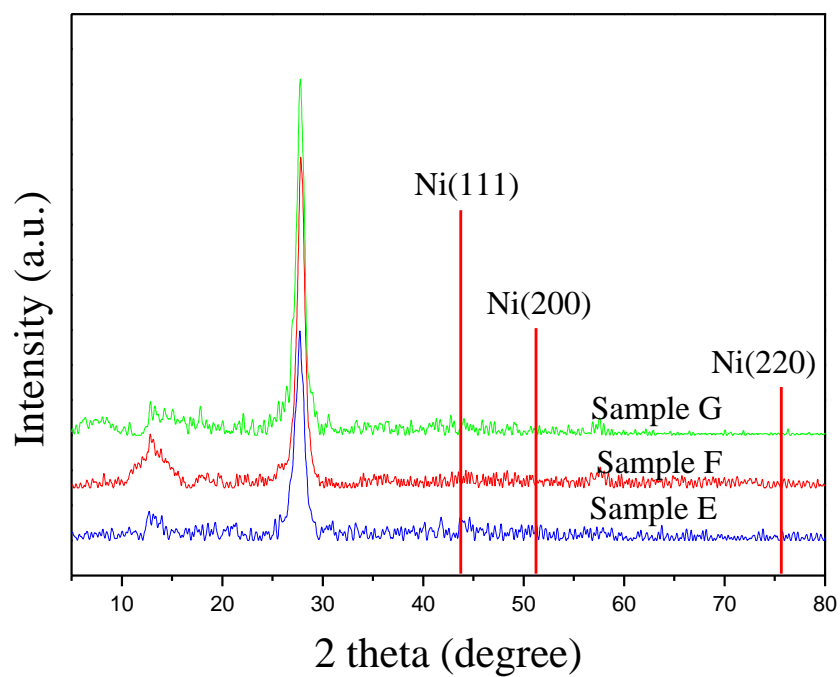

Figure S2. XRD patterns of sample E, F and G obtained by control experiments in Table 1.

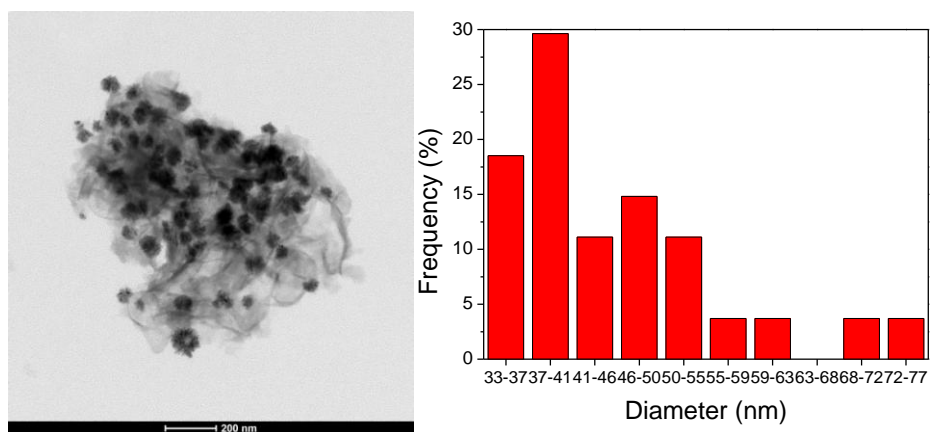

Figure S3. TEM images of Ni/g-C<sub>3</sub>N<sub>4</sub> at low magnification (left) showing the distribution of nanoparticle sizes.

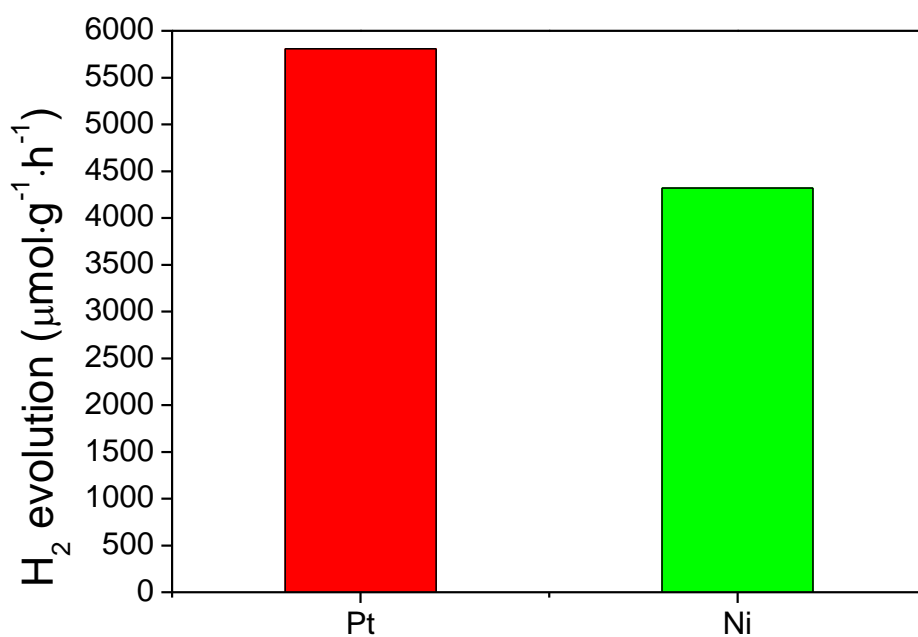

Figure S4. Comparison of photocatalytic activity of Ni-7.4 wt%/g-C<sub>3</sub>N<sub>4</sub> and Pt-7.4 wt%/g-C<sub>3</sub>N<sub>4</sub>. The system contains 10 mg photocatalyst, 10 mL 30 vol% TEOA aqueous solution. The data were obtained by photocatalytic process of 3 h using 300 W Xe lamp with an AM 1.5G filter as light source. Preparation of Pt/g-C<sub>3</sub>N<sub>4</sub>: 7.4 wt% Pt was loaded on g-C<sub>3</sub>N<sub>4</sub> in-situ by photoreduction method using H<sub>2</sub>PtCl<sub>6</sub>.

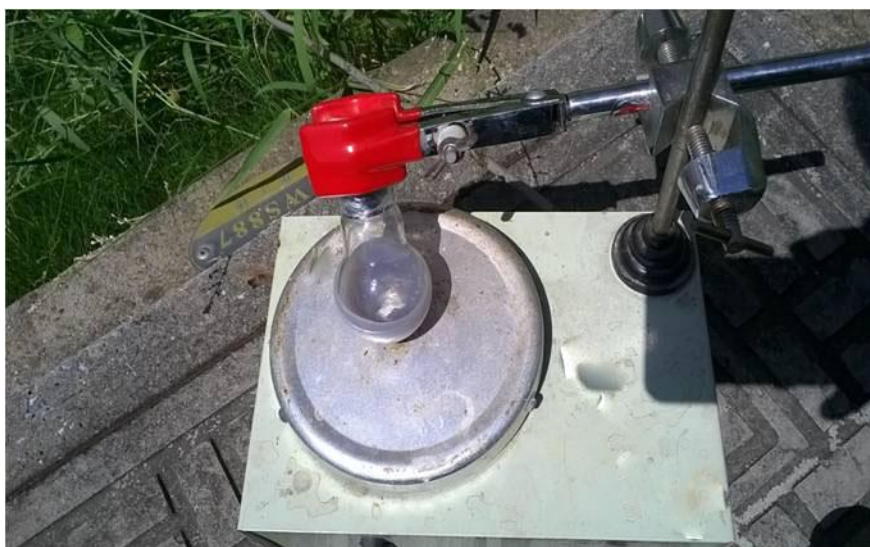

Figure S5. The photograph of outdoor equipment of sunlight-driven water splitting by Ni-7.4wt%/g-C<sub>3</sub>N<sub>4</sub> system in Wuxi city on June. 12, 2015. Outdoor temperature: 24~33°C, time: 09:30-17:00.

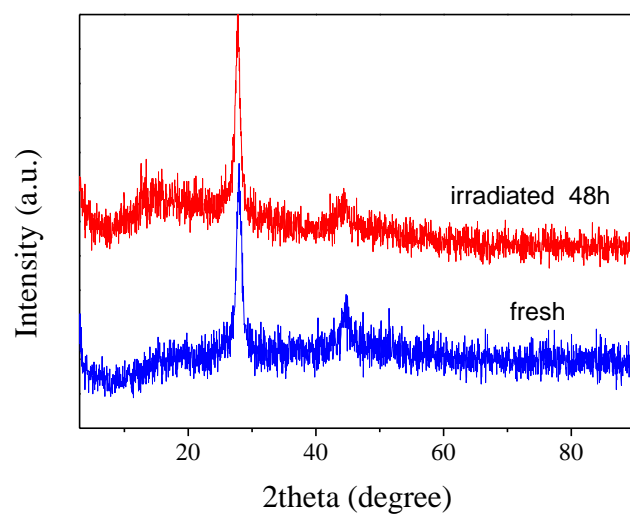

Figure S6. XRD of Ni-7.4%/g-C<sub>3</sub>N<sub>4</sub> before and after photocatalysis.

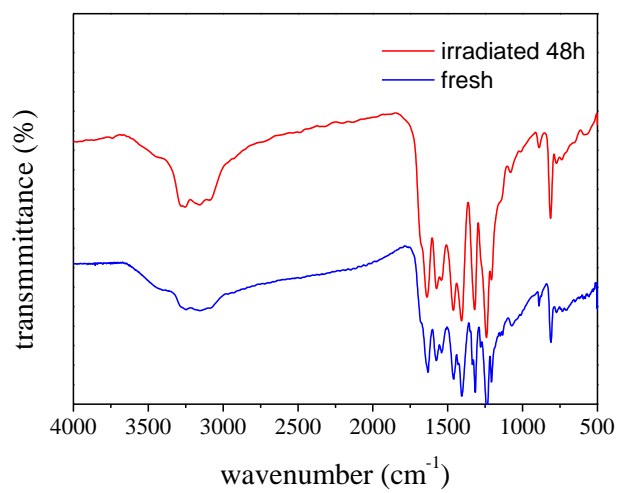

Figure S7. IR of Ni-7.4%/g-C<sub>3</sub>N<sub>4</sub> before and after photocatalysis.

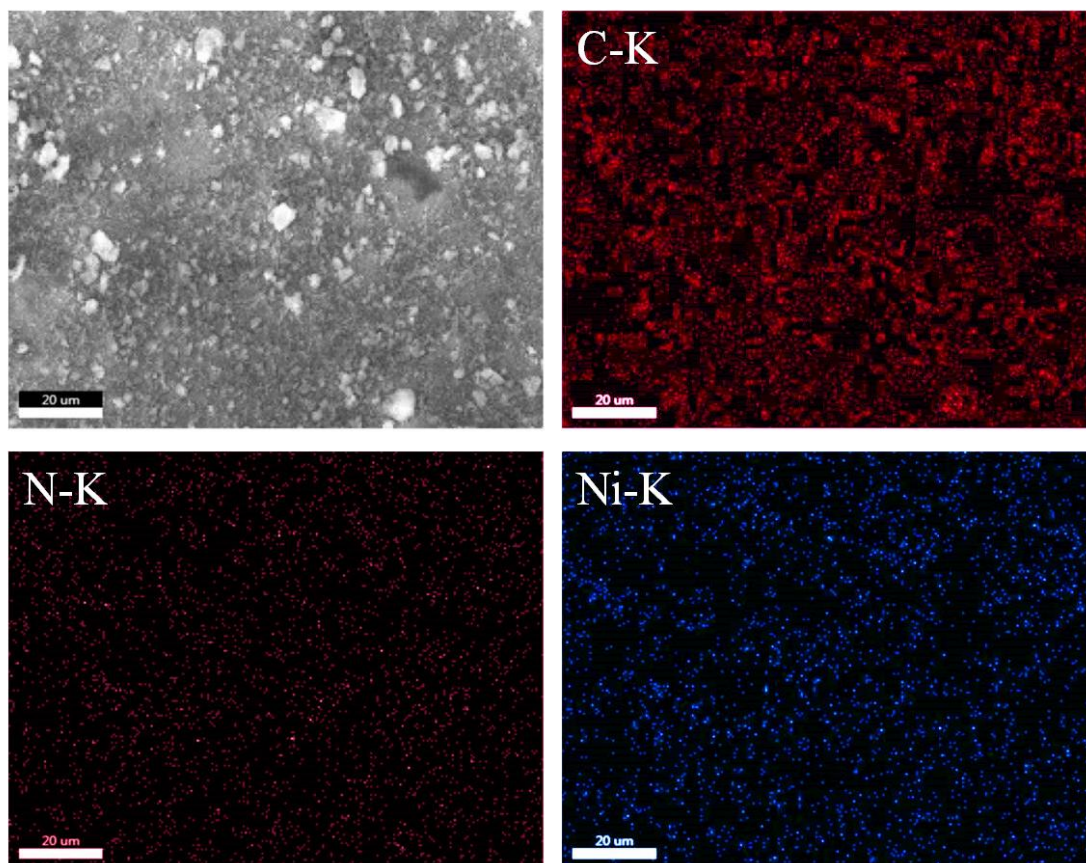

Figure S8. EDX-Mapping of Ni-7.4%/g-C<sub>3</sub>N<sub>4</sub> after 48 h photocatalysis.

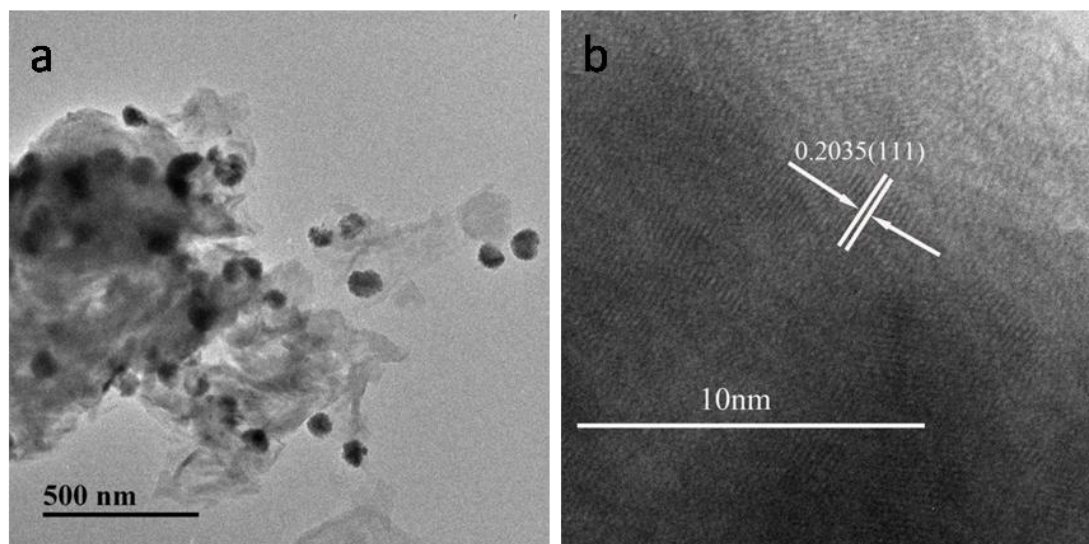

Figure S9. TEM (a) and HRTEM (b) image of Ni-7.4wt%/g-C<sub>3</sub>N<sub>4</sub> after 48 h photocatalysis.

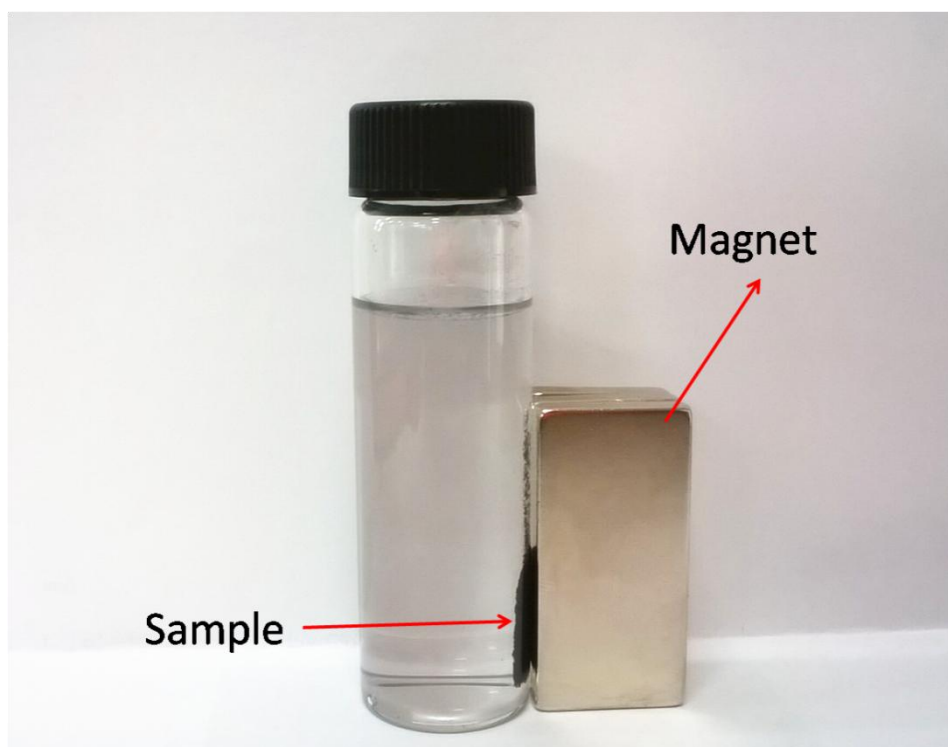

Figure S10. The photograph of using magnets to attract samples.

**Table S1. Photocatalytic H<sub>2</sub> evolution on g-C<sub>3</sub>N<sub>4</sub> with non-noble-metal cocatalysts.**

| Cocatalysts                                | Mass fraction               | sacrificial agent | Light source  | Activity ( $\mu\text{molg}^{-1}\text{h}^{-1}$ ) | Quantum yield   | Ref. |
|--------------------------------------------|-----------------------------|-------------------|---------------|-------------------------------------------------|-----------------|------|
| [Ni(TEOA)] <sub>2</sub> Cl <sub>2</sub>    | 2.0 wt% of Ni <sup>2+</sup> | triethanolamine   | 500 W Xe lamp | 2435                                            | 1.51 % (400 nm) | S1   |
| Ni(OH) <sub>2</sub>                        | 0.5 mol%                    | triethanolamine   | 350 W Xe lamp | 152                                             | 1.1% (420 nm)   | S2   |
| NiS                                        | 1.1 wt%                     | triethanolamine   | 300 W Xe lamp | 482                                             | 1.9 % (440 nm)  | S3   |
| Co <sup>III</sup> (dmgH) <sub>2</sub> pyCl | /                           | triethanolamine   | 300 W Xe lamp | 216.7                                           | 0.62% (365 nm)  | S4   |
| NiS <sub>2</sub>                           | 2.0 wt%                     | triethanolamine   | 300 W Xe lamp | 406                                             | /               | S5   |
| Ni–Tu–TETN                                 | /                           | triethanolamine   | 300 W Xe lamp | 510                                             | 0.2% (420 nm)   | S6   |
| NiS                                        | 1.5 mol%                    | triethanolamine   | 300 W Xe lamp | 447.7                                           | /               | S7   |
| Ni(dmgh) <sub>2</sub>                      | 3.5 wt%                     | triethanolamine   | 300 W Xe lamp | 236                                             | /               | S8   |
| MoS <sub>2</sub>                           | 2.89 wt%                    | triethanolamine   | 300 W Xe lamp | 252                                             | /               | S9   |
| Ni                                         | 10wt%                       | triethanolamine   | 500W Xe lamp  | 168.2                                           | /               | S10  |
| NiS                                        | 0.97wt%                     | triethanolamine   | 150 W Xe lamp | 84                                              | 1.4%            | S11  |

|                                                 |          |                 |               |      |                   |           |
|-------------------------------------------------|----------|-----------------|---------------|------|-------------------|-----------|
|                                                 |          |                 |               |      | (420 nm)          |           |
| Ni/NiO                                          | 2 wt%    | triethanolamine | 300 W Xe lamp | 200  | /                 | S12       |
| C <sub>3</sub> N <sub>3</sub> S <sub>2</sub> Ni | 0.1 wt%  | triethanolamine | 300 W Xe lamp | 110  | 2.6 %<br>(420 nm) | S13       |
| Ni                                              | 0.73 wt% | triethanolamine | 300 W Xe lamp | 103  | /                 | S14       |
| Ni                                              | 7.4wt%   | triethanolamine | 300 W Xe lamp | 4318 | 2.01%<br>(400 nm) | This work |

## References

- S1 J. Dong, M. Wang, X. Li, L. Chen, Y. He, L. Sun, *ChemSusChem.*, 2012, 5, 2133.
- S2 J. Yu, S. Wang, B. Cheng, Z. Lin, F. Huang, *Catal. Sci. Technol.*, 2013, 3, 1782.
- S3 J. Hong, Y. Wang, W. Zhang, R. Xu, *ChemSusChem*, 2013, 6, 2263.
- S4 S. W. Cao, X. F. Liu, Y. P. Yuan, Z. Y. Zhang, J. Fang, S. C. Loo, J. Barber, T. C. Sum, C. Xue, *Phys. Chem. Chem. Phys.*, 2013, 15, 18363.
- S5 L. Yin, Y. P. Yuan, S.W. Cao, Z. Zhang, C. Xue, *RSC Adv.*, 2014, 4, 6127.
- S6 D. Wang, Y. Zhang, W. Chen, *Chem. Commun.*, 2014, 50, 1754.
- S7 Z. Chen, P. Sun, B. Fan, Z. Zhang, X. Fang, *J. Phys. Chem. C*, 2014, 118, 7801.
- S8 S. W. Cao, Y. P. Yuan, J. Barber, S. C. J. Loo, C. Xue, *Appl. Surf. Sci.*, 2014, 319, 344.
- S9 H. Zhao, Y. Dong, P. Jiang, G. Wang, H. Miao, R. Wu, L. Kong, J. Zhang, C. Zhang, *J. Mater. Chem. A*, 2015, 3, 7375.
- S10 L. Bi, D. Xu, L. Zhang, Y. Lin, D. Wang, and T. Xie, *Phys. Chem. Chem. Phys.*, 2015, 17, 29899.
- S11 Y. Lu, D. Chu, M. Zhu, Y. Du and P. Yang, *Phys. Chem. Chem. Phys.*, 2015, 17, 17355.
- S12 G. Zhang, G. Li, X. Wang, *ChemCatChem*, 2015, 7, 2864.
- S13 Y. Chen, B. Lin, W. Yu, Y. Yang, S. M. Bashir, H. Wang, K. Takanebe, H. Idriss J. M. Basset, *Chem. Eur. J.*, 2015, 21, 10290.
- S14 A. Indra, P. W. Menezes, K. Kailasam, D. Hollmann, M. Schröder, A. Thomas, A. Brückner, M. Driess, *Chem. Commun.*, 2016, 52, 104.
